# Supplementary material
Source: PubMed Central journal article supplement (PMC515356)
Supplement: mbc_E03-11-0851_1.pdf [file mbc_E03-11-0851_1.pdf]

| Cytosol                | Microsomes | p38MAPK  |               | JNK-1    |               | ERK-1    |               |
|------------------------|------------|----------|---------------|----------|---------------|----------|---------------|
|                        |            | activity | 1/2 variation | activity | 1/2 variation | activity | 1/2 variation |
| ctl                    | Untreated  | 1.00     | 0.00          | 1.00     | 0.00          | 1.00     | 0.00          |
|                        | + Azc      | 12.52    | 0.23          | 2.18     | 0.27          | 2.89     | 0.32          |
|                        | + Tun      | 7.24     | 0.26          | 2.69     | 0.13          | 1.10     | 0.10          |
| -Nck                   | + Azc      | 13.00    | 0.45          | 3.78     | 0.57          | 1.34     | 0.19          |
|                        | + Tun      | 9.06     | 0.19          | 2.97     | 0.15          | 0.10     | 0.03          |
| -Nck<br>+ 3SH3-Nck wt  | + Azc      | 7.09     | 0.60          | 2.01     | 0.06          | 3.64     | 0.33          |
|                        | + Tun      | 5.91     | 0.21          | 1.64     | 0.04          | 1.46     | 0.47          |
| -Nck<br>+ 3SH3-Nck mut | + Azc      | 13.83    | 0.81          | 3.64     | 0.19          | 1.84     | 0.23          |
|                        | + Tun      | 8.74     | 0.02          | 2.99     | 0.09          | 0.88     | 0.22          |
| -Shc                   | + Azc      | 10.43    | 0.27          | 2.08     | 0.11          | 3.34     | 0.18          |
|                        | + Tun      | 7.15     | 2.69          | 2.48     | 0.06          | 1.52     | 0.56          |
| -Shc<br>+ SH2-Shc wt   | + Azc      | 15.56    | 0.35          | 1.74     | 0.42          | 1.82     | 0.17          |
|                        | + Tun      | 11.89    | 0.51          | 1.36     | 0.03          | 0.75     | 0.10          |
| -Shc<br>+ SH2-Shc mut  | + Azc      | 10.05    | 0.28          | 2.07     | 0.05          | 2.90     | 0.15          |
|                        | + Tun      | 8.36     | 0.20          | 2.45     | 0.06          | 1.32     | 0.07          |

**Table 1. Impact of immunodepletion of Shc and Nck on ER-stress-mediated activation of SAPK/MAPK pathways.** ER microsomes immuno-isolated from non-treated, 10 mM Azc or 10 µg/ml Tun treated cells for 10 min were incubated with control RLC (Ctl), or RLC that had been previously immunodepleted of Nck (-Nck) either in the presence or absence of 10 µg recombinant Nck(3SH3) wt, Nck(3SH3) mutant or Shc(2SH2) wt or Shc(2SH2) mutant. ERK-1, JNK-1 or p38<sup>MAPK</sup> activities were determined as described in Experimental Procedures. Results are presented as fold increase of kinase activity upon Azc (light grey) or Tun (dark grey) treatment over control (n=2, value ± 1/2variation).

**Supplementary data Nguyễn et al.**
